# AN EVALUATION OF THE EFFECTIVENESS OF CRITICAL COMPONENTS OF THE CHAIN OF SURVIVAL IN OUT-OF-HOSPITAL CARDIOPULMONARY RESUSCITATION IN NIGERIA

## Authors and Affiliations

1. KOLAWOLE, Israel Kayode, (Kolawole I.K), MBBS, DA, PGD. Pall Med. Department of Anaesthesia, University of Ilorin, Ilorin, Nigeria. Email: [kolawole.ik@unilorin.edu.ng](mailto:kolawole.ik@unilorin.edu.ng) **ORCID ID: 0000-0001-5823-8685**
2. ABDUR-RAHMAN, Lukman Olajide, (Abdur-Rahman L.O), MBBS, MPH, MD, Cert. Health Leadership and Management. Department of Surgery, University of Ilorin, Ilorin, Nigeria. Email: [bolarjide@yahoo.com](mailto:bolarjide@yahoo.com) **ORCID ID:0000-0002-7557-5824**
3. KANA, Shehu Abubakar, (Kana S.A), MBBS. Department of Internal Medicine, Aminu Kano Teaching Hospital. Email: [shehukana2009@yahoo.com](mailto:shehukana2009@yahoo.com) **ORCID ID: 0000-0002-9361-2684**
4. AJALA, Aisha Oluwabunmi (Ajala A.O), MB.Ch.B. Department of Internal Medicine, University of Port-Harcourt Teaching Hospital, Rivers State, Nigeria. Email: [ajalabunmi@gmail.com](mailto:ajalabunmi@gmail.com) **ORCID ID: 0000-0003-4418-6946**
5. AJE. Akinyemi (Aje. A), MBBS. Department of Medicine, University College Hospital, Ibadan, Oyo-State, Nigeria. Email: [ajeyemi@yahoo.co.uk](mailto:ajeyemi@yahoo.co.uk) **ORCID ID: 0000-0002-5943-4220**
6. ALAGBE-BRIGGS, Olubusola Temitope, (Alagbe-Briggs O.T), MBBS, MSc Med.Ed., Cert. in LMIH (UW). Department of Anaesthesiology, University of Port-Harcourt. Email: [busolabriggs@yahoo.co.uk](mailto:busolabriggs@yahoo.co.uk) **ORCID NUMBER: 0009-0002-5980-7637**
7. AYOOLA, Yekeen Ayodele, (Ayoola Y.A), MBCHB. Department of Internal Medicine, Gombe State University. Email: [profyekeen@yahoo.com](mailto:profyekeen@yahoo.com) **ORCID ID: 0000000306608458**
8. MBADIWE, Nkeiruka Chigekwu, (Mbadiwe N.C), B. Med Sc, MBBS, Cert. Interventional Cardiology ( Hyderabad). Department of Internal Medicine, University of Nigeria, Nsuka. Email: [nkeiruchimbadiwe@gmail.com](mailto:nkeiruchimbadiwe@gmail.com) **ORCID ID: 0000-000-9390-6431**
9. GALADANCI, Hadiza Shehu, (Galadanci H.S), MBBS, MSc. Department of Obstetrics and Gynaecology, Aminu Kano Teaching Hospital, Director Africa Centre of Excellence for population Health and Policy, Bayero University, Kano. Email: [hgaladanci@yahoo.com](mailto:hgaladanci@yahoo.com) **ORCID ID: 0000-0001-5810-2884**
10. LADIPO, Josephus Kayode, (Ladipo J.K), MBBS. Department of Surgery, University of Ibadan. Email: [jkladipo@gmail.com](mailto:jkladipo@gmail.com) **ORCID ID:**
11. SALAHU, Dalhat, (Salahu. D), MBBS. Department of Anaesthesia, Aminu Kano Teaching Hospital, Kano. [dalhatusalahu@gmail.com](mailto:dalhatusalahu@gmail.com) **ORCID ID: 0000-0003-0215-0873**

- 1 12. SANUSI, Arinola Adeyoola, (Sanusi A.A), MBBS, DA. Department of Anaesthesia,  
2 College of Medicine, University of Ibadan/University College Hospital, Ibadan, Oyo  
3 State, Nigeria. Email: [arinolasanus@yahoo.com](mailto:arinolasanus@yahoo.com) **ORCID ID: 0000-0003-1725-9097**  
4 13. OGUNMODEDE, James Ayodele, (Ogunmodede J.A). MBBS. Department of  
5 Medicine, University of Ilorin, Ilorin Nigeria. Email: [ogunmodede.ja@unilorin.edu.ng](mailto:ogunmodede.ja@unilorin.edu.ng)  
6 **ORCID ID: 0000000316771232**  
7 14. ONYEKA, Tonia Chinyelu, (Onyeka T.C). MBBS, MSc Pain Mgt. Department of  
8 Anaesthesia/Pain & Palliative Care Unit, University of Nigeria Teaching Hospital,  
9 Ituku-Ozalla, Enugu, IVAN Research Institute, Enugu. Email:  
10 [tonia.onyeka@unn.edu.ng](mailto:tonia.onyeka@unn.edu.ng) **ORCID ID:0000-0001-8138-3100**  
11 15. YUSUF, Tanimu Sambo, (Yusuf T.S), MBBS. Department of Anaesthesia, Gombe  
12 State University. Email: [yusufsambo.ys@gmail.com](mailto:yusufsambo.ys@gmail.com) **ORCID ID: 0000-0002-3135-**  
13 **0404**  
14 16. SOYANNWO, Olaitan A. (Soyannwo O.A), MBBS, DA, M.Med. Centre for  
15 Palliative Care, Nigeria. Email: [folait2001@yahoo.com](mailto:folait2001@yahoo.com) **ORCID ID: 0000-0001-**  
16 **8388-9105**  
17 17. Dr Terfa Kene, MBBS, MSc Epidemiology and Medical Statistics. Ave Health Sense  
18 Ltd, Abuja. Email: [avehealthsense@gmail.com](mailto:avehealthsense@gmail.com)  
19 **ORCID ID: 0000-0002-2110-2407.**

20

21 **Short title: Evaluation of Chain of survival in Nigeria**

22 **Corresponding Author:**

23 **Prof. Israel Kayode KOLAWOLE**

24 Department of Anaesthesia, Faculty of Clinical Sciences, College of Health Sciences,  
25 University of Ilorin, Ilorin, Nigeria.

26 Email: [kolawole.ik@unilorin.edu.ng](mailto:kolawole.ik@unilorin.edu.ng)

27 **Phone number: +2348033781032.**

28 **WORD COUNTS:**

29 Manuscript length =4,994

30 Abstract =350

31 Number of references =32

32 Number of figures and tables =6

33 **ABSTRACT**

34 **Background:** The “Chain of Survival” (CoS), provides a structure to evaluate an emergency  
35 response system for out-of-hospital cardiac arrest (OHCA) in any community. This chain has  
36 not been previously evaluated in an African population. The aim of this study was to assess  
37 the effectiveness and efficiency of out-of-hospital CPR by evaluating the components of the  
38 CoS following sudden cardiac arrest in Nigeria.

39 **Methodology:** This was a prospective multicenter descriptive cross-sectional exploratory  
40 survey of epidemiology and outcome of sudden cardiac arrest (SCA) in adult Nigerians. The  
41 survey was conducted in six University teaching hospitals in the 6 geopolitical zones.  
42 Information concerning the patients were obtained from family member or an accompanying  
43 person, and hospital emergency department personnel. Exclusion criteria included age < 18  
44 years, incomplete registered data, do not attempt resuscitation (DNAR) decision, and patients  
45 in whom resuscitation was not attempted. Primary outcome measures were return of  
46 spontaneous circulation (ROSC), survival to hospital admission and discharge.

47 **Results:** A total of 387 OHCA patients aged between 18 and 115 years met the inclusion  
48 criteria. They consisted of 62.5% males and 37.5% females, giving a male/female ratio of  
49 approximately 1.7:1, and the mean age was  $49.9 \pm 19.15$  years. Most (55.6%) of the arrests  
50 occurred at home. Ninety-one-point seven percent (91.7%) of the arrests were witnessed.  
51 Calls were made to ambulance services but only in a third (34.6%) did ambulance arrive. The  
52 time taken for the ambulance to arrive at the call site ranged between 10 minutes and 60  
53 minutes, with a mean time of arrival of  $25.6 \pm 20.5$  minutes. Only 14.3% of ambulances had  
54 facilities for both BLS interventions. Pre-hospital resuscitation was attempted in 15.2%. Pre-  
55 hospital ROSC was achieved in 3.6% of all the SCA events, but only 1.8% survived to  
56 hospital admission and were eventually discharged.

57 **Conclusion:**

58 The emergency response service to OHCA in Nigeria is very poor due to weaknesses in the  
59 critical components of the CoS. There is a need for regular evaluation of the effectiveness of  
60 the CoS to identify weaknesses, and efforts made to improve performance in every  
61 component of the chain, through community wide BLS training.

62 **KEY WORDS:** Out of hospital cardiac arrest, Chain of survival, evaluation, Nigeria

63 **Non-standard Abbreviation**

64 Chain of survival (CoS)

65 **Clinical Perspective:**

66 What is new?

- 67 • This is the first large scale multi-center study in Nigeria, and probably in Africa, to  
68 evaluate the effectiveness and efficiency of the components of chain of survival in  
69 out-of-hospital cardiopulmonary resuscitation, reflecting the complex interplay of  
70 resources, setting and bystander engagement on the clinical outcomes of cardiac  
71 arrest.
- 72 • The emergency response service system for OHCA in Nigeria is very poor.
- 73 • This study revealed the shortcomings related to cardiopulmonary resuscitation due to  
74 resource-limitation, which bellies the practical difficulties inherent in implementing  
75 the scientific recommendations on resuscitation formulated primarily from the  
76 perspective of a high-resource environment by the International Liaison Committee  
77 on Resuscitation.

78 Clinical implications

- 79 • The shortcomings observed in cardiopulmonary resuscitation in this study calls for a  
80 well-organized, coordinated deliberate efforts to strengthen all parts of the chain of  
81 survival in a manner that emphasizes engagement from the community, and the

82 development of locally implemented, strong pre-hospital chain of care, which is  
83 adaptable to the requirements of different cardiac emergencies.

- 84 • There should be a long-term, ongoing evaluation of the CoS to identify weaknesses  
85 and efforts made to improve performance in every community through a deliberate  
86 effort to ensure training on BLS for everyone (medical and non-medical), and from an  
87 early age.

88

89

90

91

92

93

94

95 **INTRODUCTION**

96 An out-of-hospital sudden cardiac arrest (OHCA) is defined as cessation of cardiac  
97 mechanical activity that occurs outside of the hospital setting and is confirmed by the absence  
98 of signs of circulation.<sup>1</sup> It remains, a major public health challenge worldwide, with survival  
99 ranging between 2 and 11%.<sup>2,3</sup>

100 The term “Chain of Survival” describes a series of sequentially connected interdependent  
101 links of critical interventions designed to reduce the mortality associated with cardiac arrest.  
102 The concept was proposed in the 1992 CPR guidelines and provides a structure to evaluate an  
103 emergency response system for OHCA patients in any community for optimal outcome.<sup>4</sup> The  
104 six structural components of the Chain include: early recognition and access to emergency  
105 medical care, early CPR, early defibrillation, early advanced cardiac life support (ACLS),  
106 integrated post-resuscitative care, and long-term rehabilitation. Strict adherence to the Chain  
107 is necessary for optimal outcome. However, international resuscitation guidelines are usually  
108 based on scientific recommendations, which are formulated typically from the perspective of  
109 well-resourced environment, with little consideration of applicability in LMIC.

110 This is the first large scale multi-center study in Nigeria, and probably in Africa, that have  
111 assessed the effectiveness and efficiency of the components of CoS in out-of-hospital CPR,  
112 reflecting the complex interplay of resources, setting and bystander engagement, on the  
113 clinical outcomes of cardiac arrest. The aim was to assess performance and identify gaps in  
114 the components of the Chain.

115 **METHODS**

116 **Study setting:** Nigeria is the most populous country in Africa, and the most populous black  
117 nation in the World,<sup>5</sup> with an estimated population of about 206 million as at 2020.<sup>6</sup> The  
118 country is a multi-ethnic, multi religious and multi-cultural society, officially subdivided into  
119 six geopolitical zones (Figure 1). This study was conducted in six purposefully selected

120 University teaching hospitals in the six geopolitical zones. The hospitals are, University of  
121 Ilorin Teaching hospital (North Central), Aminu Kano teaching hospital (North-West),  
122 University College hospital, Ibadan (South-West), Gombe State University teaching hospital  
123 (North-East), University of Nigeria teaching hospital, Ituku-Ozalla, Enugu (South-East) and  
124 University of Port-Harcourt teaching hospital (South-South).

125 **Design:** A sub-analysis of the data on OHCA extracted from a prospective multicenter  
126 descriptive cross-sectional exploratory survey of epidemiology and outcome of sudden  
127 cardiac arrest (SCA) in Nigerian adults was conducted.

128 **Participants:** All adults ( $\geq 18$  years) who suffered OHCA and were transferred to the six  
129 selected teaching hospitals from 10<sup>th</sup> November 2020 – 9<sup>th</sup> July 2022 were recruited into the  
130 study.

131 **Exclusion criteria:** Sudden cardiac arrest in patients that had non-cardiac chronic terminal  
132 illness like malignancy that was not in remission, incomplete data, or violation of protocol  
133 regarding age limits, and patients with “do not attempt resuscitation” instructions (DNAR),  
134 and patients in whom resuscitation was not attempted were excluded.

### 135 **Main outcome measures**

136 Main outcome measures were ROSC, survival to hospital admission and survival to hospital  
137 discharge.

138 **Compliance with Ethical Standards:** The study was approved by the local ethics committee  
139 of each participating hospital and the National health research ethics committee  
140 (NHREC/01/01/2007-25/08/2020).

### 141 **STATISTICAL ANALYSIS**

142 Statistical analysis was done using descriptive statistics (frequency, proportions, means and  
143 standard deviation) to summarize variables. Analysis of quantitative data was done using  
144 IBM-SPSS version 25.0 (SPSS Inc., Chicago, IL, USA. Data was appropriately presented

145 using tables. Continuous variables were summarised using means and standard deviations for  
146 normally distributed variables, and any between group comparisons was tested with the  
147 student's t-test or ANOVA as indicated. Categorical variables like gender, causes of SCA and  
148 treatment types were summarized as number (frequency tables) and percentages, and  
149 compared between groups with the Chi-square test and Yate corrected and Fishers' exact  
150 tests as indicated. Survival was determined as the percentage of persons who survived to  
151 hospital discharge out of the number of persons with SCA. Bi-variate analysis (cross  
152 tabulation) was done to have an idea of how some factors relate directly to the outcome and  
153 the site of occurrence of the sudden cardiac arrest. All tests were considered significant at  
154  $p < 0.05$ .

155

## 156 **RESULTS**

157 A total of 387 OHCA brought to the selected hospitals met the inclusion criteria for analysis.

158 Table I shows the demographic and socio-cultural characteristics of the patients. There were

159 242 (62.5%) males and 145 (37.5) females, giving a male/female ratio of approximately

160 1.7:1. The age ranged between 18 years and 115 years, with a mean age of  $49.9 \pm 19.15$ , and

161 median of 48.0 years. The patients were arbitrarily stratified into 3 age categories. The mean

162 age of males was  $49.9 \pm 19.35$  years and the mean age of females was  $49.8 \pm 18.86$  years.

163 Table II shows the location of arrests, witnesses to the arrest and responses to the patients.

164 Most of the arrests 215 (55.6%) occurred at home, 147 (38.0%) occurred at public places,

165 such as offices, market, roadside, party, place of worship and sports field, while 25 (6.5%)

166 cases occurred in other places, (such as en-route to hospital, peripheral hospital, delivery

167 home and others). Three hundred and fifty-five (91.7%) of the SCA were witnessed. Arrests

168 were not witnessed in 32 (8.3%) of cases. A total of 351 (90.7%) patients possessed mobile

169 phones. Calls were made to ambulance services in 26 (6.7%) of cases, but in only 9 (34.6%)



170 of these cases did ambulance arrive, of which only 3 (42.9%) had facilities for providing life  
171 support interventions. The time taken for the ambulance service to arrive to the call site  
172 ranged between 10 minutes and 60 minutes with a mean time of arrival of  $25.6 \pm 20.5$  minutes  
173 (median =10 minutes). Fifty-five-point six percent of the ambulances arrived between 10 and  
174 19 minutes, while the remaining 44.4% arrived after 29 minutes. Ambulance did not arrive at  
175 all in 17 (65.4%) of the cases, while calls were not made for ambulance services in 361  
176 (93.3%) of the cases. Private or public transportation was the available means of conveying  
177 the patients to hospital in 369 (95.3%) of cases, while ambulances were used in 7 (1.8%) of  
178 cases, 4 (57.1%) of which had no means of providing life support interventions. Two (28.6%)  
179 of the ambulances had facilities for both basic-life support (BLS) interventions and life-  
180 saving drugs without a trained health personnel and only one (14.3%) of the ambulances was  
181 equipped with facilities for BLS intervention, life-saving drugs, defibrillators, and personnel  
182 trained to deal with emergencies. The mode of pre-hospital transportation was not specified  
183 in 11 (2.8%) of the cases.

184 Table III shows the pre-hospital medical interventions. Pre-hospital intervention  
185 (resuscitation) was attempted, either at the scene or during transportation to health facilities,  
186 in 59 (15.2%) cases. The first monitored rhythms in the OHCA were pulseless VT in 2  
187 (3.4%) victims, asystole in 1 (1.7%) and bradycardia in another (1.7%). The rhythm status  
188 was not monitored for 55 (93.2%) of the cases.

189 Table IV and V show the age and gender distribution of the patients, location of arrest,  
190 witnesses to arrest, who instituted resuscitation, place of post cardiac arrest care and  
191 outcomes of resuscitation. Pre-hospital ROSC was achieved in 14 (23.7%) of 59 resuscitation  
192 attempts, but only 7 (11.9%) patients, accounting for (50.0%) of the pre-hospital ROSC  
193 survived to hospital admission and eventually survived to hospital discharge, with an overall  
194 hospital discharge survival of 7 out of 387 SCA (1.8%). The remaining 7 (50.0%) pre-

195 hospital ROSC suffered re-arrest en-route hospital. Pre-hospital ROSC and survival to  
196 hospital admission and discharge were significantly better in the females than males, ( $p <$   
197  $0.05$ ). Of all the 147 (38.0%) cases of SCA that occurred in the public places, only 23  
198 (15.6%) benefited from bystander CPR interventions, which yielded 4 (17.4%) ROSC, none  
199 of whom survived to hospital admission. Resuscitation was attempted in 24 (11.2%) of the  
200 215 patients who had SCA at home, out of which only 3 (12.5%) achieved ROSC, but only 1  
201 survived to hospital admission and was eventually discharged from hospital alive.  
202 Resuscitation was attempted in 12 (48.0%) of the 25 patients who had SCA in other places,  
203 apart from home and public places, (such as en-route to hospital, peripheral hospital, delivery  
204 home and others), out of which 7 (58.3%) achieved ROSC, and 6 (50.0%) survived to  
205 hospital admission and were eventually discharged from hospital alive. Proportionately, 12  
206 (48.0%) of the arrests that occurred in places such as en-route to hospital, peripheral hospital  
207 and delivery homes benefited from pre-hospital intervention compared to those who arrested  
208 in other places. Survival was also significantly better in terms of pre-hospital ROSC, survival  
209 to hospital admission and survival to eventual discharge from hospital in this category of  
210 patients ( $p = 0.0001$ ) compared to the other categories. Majority, 44 of 59 (74.6%) of the pre-  
211 hospital CPR intervention were provided by bystanders, while only 15 (25.4) were provided  
212 by trained health personnel. However, most (7 or 50.0%) of the pre-hospital ROSC were  
213 from patients resuscitated by healthcare personnel and 6 (85.7%) of them survived to hospital  
214 admission and were eventually discharged from hospital alive. This is unlike the 7 (50.0%)  
215 pre-hospital ROSC resuscitated by bystanders, out of which only 1 (14.3%) survived to  
216 hospital admission and was eventually discharged from the hospital alive. These differences  
217 were statistically significant for ROSC ( $p < 0.05$ ). The ROSC, survival to hospital admission  
218 and discharge were also significantly more in the CPR provided by the trained health  
219 personnel ( $p < 0.05$ ).

220 Post cardiac arrest hospital care was done for 4 (57.1%) of the 7 admitted patients with  
221 ROSC in the intensive care unit (ICU), 1 (14.3%) in the high dependency unit (HDU) and 2  
222 (28.6%) in the open ward. All the patients (100.0%) survived to discharge regardless of the  
223 area of post arrest care. The neurological outcome at discharge, assessed using the Cerebral  
224 Performance Category (CPC) scale, showed that 4 (57.1%) of the survivors were discharged  
225 with a favorable neurological outcome (CPC of 1 or 2), and 3 (42.9%) with unfavorable  
226 neurological outcome (CPC of 3).

227

## 228 **DISCUSSION**

229 In this study, we used three working definitions of survival as described in previous studies.<sup>7,4</sup>  
230 These include (1) return of spontaneous circulation (ROSC), (2) successful hospital  
231 admission, defined as sustained ROSC till hospital admission and (3) successful hospital  
232 discharge, defined as the patient leaving the hospital alive. However, the survival rate to  
233 hospital discharge is regarded as the “gold standard” for determining the effectiveness of  
234 treatment of cardiac arrest.<sup>4</sup>

235 The overall outcomes from OHCA in this study are poor both in terms of survival, and  
236 neurologic and functional ability. The rate of pre-hospital CPR intervention (15.2%) was low.  
237 Despite the 23.7% of ROSC achieved from the pre-hospital CPR intervention, the overall  
238 survival to hospital admission and eventual discharge from hospital was only 1.8%. This  
239 finding is abysmal compared to the reports from developed countries.<sup>8,9</sup> This is indicative of  
240 the poor quality of pre-hospital CPR intervention and emergency care in our setting. The  
241 morbidity and mortality weekly report of the Cardiac Arrest Registry to Enhance Survival  
242 (CARES) – an out-of-hospital cardiac arrest surveillance, recorded an overall survival to  
243 hospital discharge rate of 9.6%,<sup>1</sup> which according to the authors was higher than in some  
244 previous reports.<sup>10</sup> Reports put the median rates of survival to hospital discharge from OHCA

245 at 7.9%.<sup>11,10</sup> However, in interpreting and comparing the findings of this study with any  
246 previous report from another population, we need to consider the context and the standard of  
247 care available for out-of-hospital medical emergencies in the different populations. Survival  
248 from OHCA varies widely across countries and geographical regions, depending on the  
249 characteristics of emergency medical services (EMS) and health care systems in the  
250 community, such as treatment availability, training, and care quality.<sup>8</sup> Reported outcomes of  
251 OHCA in low-resource settings are usually lower than those reported in patients from high-  
252 resource countries, obviously due to fewer available resources for resuscitation care  
253 compared to high-resource regions.<sup>3</sup> According to the World Health Organization, “the state  
254 of cardiac arrest and trauma resuscitation is a good reflection of the standard of pre-hospital  
255 and emergency care in any health system.”<sup>12</sup> Our findings, therefore, reflect the weaknesses  
256 in community emergency medical care service system in Nigeria compared to developed  
257 world.

258 Nigeria, by the World Bank classification, is a lower middle-income country. The healthcare  
259 service provision is cash and carry, based on out-of-pocket payments. Consequently, access  
260 to healthcare, including emergencies, remains a very big challenge, severely limited by  
261 ability of the citizens to pay for care cost. The country faces major challenges in each of the  
262 six areas in the links of the CoS in terms of timing, effectiveness, and efficiency of execution  
263 of the components of the chain. There was poor ambulance response time and more  
264 importantly, low level of community participation as shown by poor bystander CPR  
265 intervention and lack of trained EMS personnel. This is due to lack of organized pre-hospital  
266 emergency medical services, and basic infrastructural deficits. In fact, as clearly shown from  
267 the findings of this study, it is obvious that the concept of chain of survival is not well rooted  
268 in the out-of-hospital emergency medical services in Nigeria.

269 Early access, which is the first link in the Chain of Survival, is regarded as the most essential  
270 component of the chain.<sup>13</sup> However, where the arrest is not witnessed, as happened in 8.3%  
271 of cases in this study, the link will obviously be compromised. Previous study reported  
272 survival from unwitnessed cardiac arrest to be only 4% compared with 22% for witnessed  
273 arrests.<sup>14</sup> There was no record of CPR attempt in cases of unwitnessed arrest in our study.  
274 Incidentally, majority (91.7%) of the OHCA events in this study were witnessed. This  
275 volume of witnesses is large compared to what was reported in a previous study in South  
276 Africa (68%),<sup>15</sup> and in a morbidity and mortality weekly report of CARES in the United  
277 States,<sup>1</sup> and in a similar study in Canada.<sup>16</sup>

278 The benefit of an arrest being witnessed is the activation of emergency response system. The  
279 large volume of witnessed arrest in our study was, therefore, expected to facilitate the  
280 activation of the emergency medical system, which is an important part of early access.  
281 However, this is only possible where there is a dedicated nationally promoted and well  
282 publicized emergency telephone number/code for such communication. Unfortunately,  
283 providing toll free emergency response services through a dedicated unique telephone  
284 number, like 911 in the US, is a herculean task and almost an impossibility in most  
285 communities in Nigeria. This is because, a look at the displays of the emergency telephone  
286 number used in many countries throughout the world did not show Nigeria on the list.<sup>17</sup> An  
287 area-wide emergency toll-free telephone numbers/code, as obtains in the UK and North  
288 America, is either non-existent, or if at all exists in Nigeria, is not well publicized. Enhancing  
289 emergency medical response service through a dedicated unique telephone number in all  
290 communities should therefore be a top priority for Nigeria. Widespread use of dedicated  
291 emergency telephone numbers has simplified and shortened access to emergency assistance  
292 in most advanced/developed communities.

293 The home location of the arrests in this study ensured that 68.2% of the witnesses were  
294 family members (family bystanders). However, the advantage of this to the survival of the  
295 patients, in the form of early access to ensure prompt intervention, was lost in this study in  
296 the absence of prompt notification of the cardiac arrest response team, and an inefficient out-  
297 of-hospital emergency medical evacuation system (EMS). Nonetheless, the finding reinforces  
298 the need to include family members in the education efforts and information dissemination to  
299 patients at risk of sudden death in order to ensure timely and effective delivery of  
300 interventions by bystanders. The various categories of arrest witnesses in this study may also  
301 have contributed to the telephone calls made for ambulance services. Unfortunately, despite  
302 the widespread claim of good mobile telephone penetration within the communities in  
303 Nigeria, as attested to in this study with 90.7% of the victims possessing mobile phones, calls  
304 could only be made for ambulance services in 6.7% of cases.

305 The available emergency medical care system, which can be activated for OHCA in Nigeria  
306 are essentially hospital-based ambulance services. These out-of-hospital ambulance services  
307 are operated by both public and private hospitals. Furthermore, the ambulance service system  
308 in Nigeria is inefficient and bedeviled with numerous structural challenges, such as delayed  
309 response time. The fact of this situation was buttressed by the findings of this study in which  
310 majority (55.6%) of the ambulances in this study arrived much late; arriving between 10 and  
311 19 minutes, while a sizable number (44.4%) arrived after 29 minutes. The median time of  
312 ambulance arrival was 10 minutes. This is a period long enough for permanent brain damage  
313 to ensue in the absence of any effective CPR intervention by the bystanders. A study in South  
314 Africa, which is classified as an upper middle-income country by the World Bank, found that  
315 the median response time for OHCA cases was 9 min.<sup>15</sup> Many of the ambulances in Nigeria  
316 are mere conveyor or evacuation vehicles and not necessarily designed for life-saving  
317 interventions. They are often too poorly equipped and lacked appropriately trained personnel

318 and facilities to provide BLS and AED interventions required for community emergency  
319 medical services. A good ambulance services must have adequate facilities for emergency  
320 medical intervention. At the least, the service according to the European Resuscitation  
321 Council guidelines, must have a driver with a paramedical background and a nurse, both  
322 trained and qualified to perform Advanced Cardiac Life Support (ACLS), with expertise to  
323 render such services as advanced airway interventions, administration of inotropic drugs and  
324 use of a defibrillator.<sup>18</sup>

325 The fact that ambulance transportation occurred in only 77.8% of the 9 ambulance responses  
326 suggest that, even some of the very few ambulances that responded to calls probably arrived  
327 after the patients had been transported to hospital in private or commercial vehicles. In most  
328 cases, transportation of patients to health facilities for emergency medical intervention is in  
329 Nigeria done through private arrangements using any available vehicle from family, friends  
330 or commercial taxis. This is attested to by the findings of this study, in which a high majority  
331 (95.3%) of the patients were transported to the hospital by private or public transportation.  
332 These vehicles were unlikely to have facilities for medical interventions since they were not  
333 designed for such purpose, and the survival of such patients to the hospital cannot be  
334 guaranteed. The fact that 50% of patients with pre-hospital ROSC died en-route to hospital  
335 before hospital admission demonstrate inadequate facilities / or knowledge and skills of BLS  
336 in the ambulance personnel or the accompanying bystanders in the alternative means of  
337 transportation used to convey the patients to hospital. In other words, the resources available  
338 within the community (ambulance facilities/equipment and personnel) to convey the patients  
339 to hospital could not sustain the gain already made at the scene of the event.  
340 Bystander CPR is the second link in the CoS and represents the only chance for a victim of  
341 sudden cardiac arrest to survive.<sup>19</sup> The time to initiation of bystander CPR, (the time from  
342 collapse to initiation of CPR), could not be ascertained in this study because it was not

343 monitored. It has been demonstrated that the probability of survival approximately doubles  
344 when bystanders initiate CPR before the arrival of EMS personnel.<sup>20</sup> However, the results of  
345 the present study show that, the achievement of anything close to this is hampered by a  
346 number of challenges in Nigeria due to poorly organized community emergency medical  
347 response system, poor bystander intervention and inadequate resources in terms of personnel  
348 and facilities to mount a timely and effective intervention.

349 The fact that only 21.8% of public bystanders witnessed arrests benefited from BLS  
350 intervention in this study indicates poor knowledge / or willingness to perform this  
351 intervention within the community. The rates of bystander CPR remain poor in most low-  
352 middle income countries (LMIC).<sup>21</sup> This reflects the level of community involvement in the  
353 treatment of OHCA and forms an important modifiable factor in any efforts to improve the  
354 survival of OHCA. It highlights the importance of deliberate, coordinated, and effective  
355 community-based CPR training with efforts made to teach community members about the  
356 different ways in which out-of-hospital cardiac arrest patients can present, and the need to  
357 initiate CPR, and use AEDs in the event of SCA. Countries across the world have tried to  
358 address the issue of low bystander intervention within the community by introducing  
359 mandatory CPR training at various opportunities, levels and strata of their society.<sup>22</sup> The  
360 potency of this is verifiable with the experience of Norway in which introduction of CPR  
361 training into the national school education curriculum since 1961, has succeeded in raising  
362 the average survival from OHCA to about 25%.<sup>23</sup>

363 The fear of getting involved because of the distrust of law enforcement, as identified in a  
364 previous study in minority low-income neighbourhood community in the United State of  
365 America,<sup>24</sup> is also relevant and constitute a huge potential barrier to willingness to perform  
366 bystander CPR in the LMIC, including Nigeria. To improve bystander action in cases of  
367 OHCA in Nigeria therefore, there is need to put in place appropriate laws to absolve the



368 bystander who provides reasonable aid/offer assistance to victims of SCA in the community  
369 for the victim's health condition and protect him/her from prosecution if anything goes  
370 wrong. Such laws will encourage laypersons to willingly help without any hesitation.  
371 Although the CPR knowledge and skill of the family members and bystanders who witnessed  
372 the arrest in our study could not be ascertained, the findings of the study demonstrate a poor  
373 knowledge and skills of BLS within the community. This is attested to by the fact that, even  
374 with the 15.2% pre-hospital CPR interventions, only a small percentage (23.7%) of pre-  
375 hospital ROSC was achieved, with an eventual hospital admission and discharge survival of  
376 11.9% respectively. The 1.8% overall hospital discharge survival out of the total 387 OHCA  
377 events analyzed for the study is abysmally low compared to the overall survival rate of 11.2%  
378 reported in the CARES study,<sup>1</sup> and the average survival of 25% in Norway.<sup>23</sup> This shows that  
379 even when an arrest is witnessed, the success of CPR, if at all instituted, will depend on the  
380 speed of initiation and the knowledge and skills of the operator. Deficient resuscitation skill  
381 within the community is a risk factor responsible for poor outcome after out-of-hospital  
382 cardiac arrest, even in witnessed arrests. However, it is good enough that some of the  
383 bystanders, (family bystanders and public bystanders), initiated the first link in the chain of  
384 survival by providing BLS interventions to some of the patients. The efforts of the bystanders  
385 (family and public) in this study yielded an overall 15.9% of pre-hospital ROSC in all the  
386 cases of their 74.6% CPR interventions. On the other hand, the 25.4% of the trained health  
387 personnel-initiated CPR achieved 46.7% pre-hospital ROSC. This clearly shows the benefits  
388 of knowledge and skills in achieving good outcomes in CPR. These healthcare workers, apart  
389 from participating in the initial resuscitation efforts, may also have assisted in arranging  
390 prompt transportation of the patient to hospital.  
391 Our study revealed that, the rate of bystander-initiated CPR was substantially lower (10.3%)  
392 if the OHCA happened in the patient's home compared with arrest in the public places

393 (21.8%). In fact, the proportion of BLS intervention (21.8%) in public bystander witnessed  
394 arrest was twice the proportion of BLS intervention (10.3%) in family bystander witnessed  
395 arrest. The low family bystander CPR is similar to the findings of previous studies.<sup>25,26</sup>  
396 However, contrary to their explanation that the lower rate of bystander CPR at home might in  
397 some degree be explained by patients living alone, a large proportion of our patients (95.6%)  
398 live with others, which is a consequent of communal living arrangement prevalent in our  
399 communities. The only plausible reason that could be adduced to lower rate of bystander  
400 CPR at home, therefore, would be the fact that the spouses/relatives/living partners were less  
401 disposed to initiating CPR, either due to inadequate awareness, fear, or lack of skills. Reason  
402 such as this has been documented previously.<sup>24,26</sup>  
403 The third link in the Chain of Survival is early defibrillation. Although, generally, each link  
404 in the CoS is important and the relative importance of each of the links has not been clearly  
405 demonstrated, rapid defibrillation is often considered to be the single most important factor in  
406 determining survival from adult sudden cardiac arrest. Investigators have observed that it is  
407 the interaction of early CPR with early defibrillation that is the most powerful intervention  
408 for ensuring optimal patient survival.<sup>4</sup> Vaillancourt et al,<sup>16</sup> identified bystander CPR and early  
409 first responder defibrillation as significant contributors to increased survival in OHCA. This  
410 is because only defibrillation can reverse a ventricular fibrillation (VF) arrest. Defibrillation  
411 is often provided in OHCA by bystanders or trained BLS first responders, if a defibrillator is  
412 available, prior to the arrival of EMS providers. However, as revealed in this study,  
413 availability of an AED is a rarity for emergency medical response in public places within the  
414 community in Nigeria. The ambulances hardly have the necessary facilities and personnel  
415 with requisite knowledge to provide emergency medical interventions. Many are hardly  
416 equipped with automated defibrillators or never accompanied by paramedics, physicians, or  
417 nurses to provide BLS-defibrillation. Of the 9 ambulances that responded for emergency

418 calls, only 3 had life-support interventions. Although one had a defibrillator the ambulance  
419 personnel lacked sufficient training to make use of the AED.

420 The initial documented cardiac rhythm at the time of the arrest has been found to be an  
421 important determinant of survival, with the VF or VT constituting the bulk of the patients in  
422 whom CPR is beneficial following SCA.<sup>27,28</sup> In a previous study by Tresch et al,<sup>28</sup> all the  
423 patients who demonstrated VF as the initial out-of-hospital rhythm had the highest immediate  
424 successful resuscitation and hospital survival rates with approximately 43% successfully  
425 resuscitated and 21% surviving. On the other hand, patients who demonstrated asystole or  
426 electromechanical dissociation had the lowest successful resuscitation and survival rates.

427 Unfortunately, rhythm identification was not possible in the large majority of patients in this  
428 study, except in (6.8%) of the 59 resuscitation attempts due to lack of resources (personnel  
429 and materials) for such within the community. Of these cases in which rhythm identification  
430 was possible, only 2 patients (3.4%) had rhythms considered to be shockable (VF), which  
431 may explain the low survival rate in our study population. The rhythms in the remaining 2  
432 patients, (1.7% each of bradycardia and asystole respectively), were not shockable and have  
433 usually been associated with poor prognosis, though some reports have recorded successful  
434 treatment with survival to hospital discharge even in asystole cardiac arrests.<sup>29,30</sup>

435 The fourth critical link in the chain for management of cardiac arrest is early effective ACLS  
436 (intubation, intravenous access and intravenous medications), which is commonly provided  
437 by paramedics, physicians or nurses at the scene or in-transit. As revealed by the findings of  
438 our survey, the present ambulance service system in Nigeria can hardly meet this level of  
439 infrastructure, facilities and personnel, which explains why the outcome is so poor. There  
440 were no records of the use of definitive airway management in our study, however,  
441 intravenous medications were administered in very few cases, suggesting that some patients  
442 had intravenous access established for drug administration.

443 The fifth link in the CoS is integrated post-resuscitative care. A person who survives SCA is  
444 usually admitted to the hospital for observation and treatment where the heart is monitored  
445 closely, medicines are given to reduce the chance of another SCA, and tests are performed to  
446 identify the cause of the SCA. The level of care received will depend on the facilities  
447 available in the different areas of the hospital. The 2010 ACLS guidelines recommend that all  
448 post-cardiac arrest patients should be managed in an ICU.<sup>31</sup> As revealed in this study, some  
449 of the post-cardiac arrest patients were managed in other hospital locations apart from the  
450 ICU. This may be as a result of limited ICU bed capacity in some of the study sites.  
451 However, it appears that the Nigeria healthcare system is not doing badly in this link of the  
452 chain of survival, as all the ROSC delivered to the hospital survived till discharge regardless  
453 of the area of the hospital where they received the post cardiac arrest care.  
454 Good neurological outcome is generally defined as a Cerebral Performance Category (CPC)  
455  $\leq 2$  or a modified Ranking scale (mRS) score of  $\leq 3$ ; both broadly representing the ability to  
456 live independently.<sup>32</sup> The neurological outcome at discharge in this study, with just 1.0% of  
457 all the SCA events achieving a favorable CPC of  $\leq 2$  and 0.8% CPC of 3, is very poor. This is  
458 probably due to the various interplay of a complex of factors, such as delayed initiation of  
459 pre-hospital CPR, quality of CPR/defibrillation and unfavorable rhythms of the arrests,  
460 resulting in prolonged no flow and low flow phases of the arrests, with significant degrees of  
461 brain damage.

462

463 **Limitations:**

464 There were several limitations of this study. First, the study is limited by the fact that it was a  
465 descriptive cross-sectional exploratory survey and conducted only in some hospitals that were  
466 purposefully selected for representation of the geopolitical zones. This could have introduced  
467 some degree of selection bias. Secondly, several time-related events in the chain of survival

468 that may be associated with survival from cardiac arrest were not specifically captured in this  
469 study. These time-related events include access time, (the time from collapse to the  
470 summoning of emergency aid), time to initiation of cardiopulmonary resuscitation (CPR),  
471 (the time from collapse to initiation of CPR) and time to definitive care, (the time from  
472 collapse to provision of defibrillation, intubation, or emergency medication). Thus, the  
473 prognostic significance of these time-related events could not be tested in this study.

#### 474 **Conclusion:**

475 Despite the various limitations to the study, the strengths of our study lie in the fact that it  
476 was a prospective multicenter survey, conducted in tertiary referral hospitals providing  
477 inpatient and outpatient services, as well as emergency and critical care services in the six  
478 geopolitical zones of the country. The study revealed the shortcomings related to  
479 cardiopulmonary resuscitation due to resource-limitation in a low-resource setting like  
480 Nigeria. This bellies the practical difficulties inherent in implementing the scientific  
481 recommendations on resuscitation formulated primarily from the perspective of a high-  
482 resource environment by the International Liaison Committee on Resuscitation (ILCOR).

483

#### 484 **Acknowledgements**

485 We are immensely indebted to late Emeritus Professor Nimi Briggs for his assistance at every  
486 stage of the project. We also acknowledge the assistance of the West African College of  
487 Surgeons (WACS) and the Endowment Fund Committee (Nigeria) of WACS for the  
488 encouragement, moral, technical and logistic support at every stage of the project.

#### 489 **Source of Funding**

490 The project was supported by a grant obtained from the Tertiary Education Trust Fund  
491 (TETFund) of the Federal Republic of Nigeria (Grant number TETFUND/DR&D-  
492 CE/NRF/2019, BATCH 6).

493 **Disclosures**

494 None

495 **References**

- 496 1. Frieden TR, Harold Jaffe DW, Thacker SB, Moolenaar RL, LaPete MA, Martinroe JC,  
497 et al. Morbidity and Mortality Weekly Report Out-of-Hospital Cardiac Arrest  
498 Surveillance-Cardiac Arrest Registry to Enhance Survival (CARES), Centers for  
499 Disease Control and Prevention MMWR Editorial and Production Staff MMWR  
500 Editorial Board. 2011;
- 501 2. Yan S, Gan Y, Jiang N, Wang R, Chen Y, Luo Z, et al. The global survival rate among  
502 adult out-of-hospital cardiac arrest patients who received cardiopulmonary  
503 resuscitation: A systematic review and meta-analysis. *Crit Care*. BioMed Central Ltd.;  
504 2020 Feb 22;24(1):1–13.
- 505 3. Berdowski J, Berg RA, Tijssen JGP, Koster RW. Global incidences of out-of-hospital  
506 cardiac arrest and survival rates: Systematic review of 67 prospective studies.  
507 *Resuscitation* [Internet]. Elsevier Ireland Ltd; 2010;81(11):1479–87. Available from:  
508 <http://dx.doi.org/10.1016/j.resuscitation.2010.08.006>
- 509 4. Guidelines 2000 for Cardiopulmonary Resuscitation and Emergency Cardiovascular  
510 Care. Part 12: from science to survival: strengthening the chain of survival in every  
511 community. The American Heart Association in collaboration with the International  
512 Liaison Committee on Resuscitation - PubMed [Internet]. [cited 2023 Jan 26].  
513 Available from: <https://pubmed.ncbi.nlm.nih.gov/10966681/>
- 514 5. Population in Africa, by country 2020 | Statista [Internet]. [cited 2023 Jan 26].  
515 Available from: [https://www.statista.com/statistics/1121246/population-in-africa-by-](https://www.statista.com/statistics/1121246/population-in-africa-by-country/)  
516 [country/](https://www.statista.com/statistics/1121246/population-in-africa-by-country/)
- 517 6. Nigeria Population (2023) - Worldometer [Internet]. [cited 2023 Mar 4]. Available from:  
518 <https://www.worldometers.info/world-population/nigeria-population/>
- 519 7. Eisenberg MS, Cummins RO, Damon S, Larsen MP, Hearne TR. Survival rates from  
520 out-of-hospital cardiac arrest: recommendations for uniform definitions and data to  
521 report. *Ann Emerg Med*. *Ann Emerg Med*; 1990;19(11):1249–59.
- 522 8. Institute of Medicine of the National Academies. Strategies to Improve Cardiac Arrest  
523 Survival A Time to Act. Report Brief. 2015.
- 524 9. Vellano K, Crouch A, Rajdev M, Mcnally B. Cardiac Arrest Registry to Enhance  
525 Survival (CARES) Report on the Public Health Burden of Out-of-Hospital Cardiac  
526 Arrest Institute of Medicine. 2015;
- 527 10. Sasson C, Rogers MAM, Dahl J, Kellermann AL. Predictors of survival from out-of-  
528 hospital cardiac arrest: a systematic review and meta-analysis. *Circ Cardiovasc Qual*  
529 *Outcomes*. *Circ Cardiovasc Qual Outcomes*; 2010 Jan;3(1):63–81.
- 530 11. Nichol G, Thomas E, Callaway CW, Hedges J, Powell JL, Aufderheide TP, et al.  
531 REGIONAL VARIATION IN OUT-OF-HOSPITAL CARDIAC ARREST INCIDENCE  
532 AND OUTCOME. *JAMA : the journal of the American Medical Association*. NIH Public  
533 Access; 2008 Sep 9;300(12):1423.

- 534 12. Aufderheide TP, Nolan JP, Jacobs IG, Van Belle G, Bobrow BJ, Marshall J, et al.  
535 Global health and emergency care: a resuscitation research agenda--part 1. *Acad*  
536 *Emerg Med. Acad Emerg Med*; 2013 Dec;20(12):1289–96.
- 537 13. Cummins R.O, Chamberlain D.A, Abramson N.S et al. Recommended guidelines for  
538 uniform reporting of data from out-of-hospital cardiac arrest: the Utstein Style. A  
539 statement for health professionals from a task force of the American Heart  
540 Association, the European Resuscitation Council, the Heart and Stroke. *Circulation*.  
541 1991;84(2):960–75.
- 542 14. Eisenberg MS, Bergner L, Hallstrom A. Cardiac Resuscitation in the Community:  
543 Importance of Rapid Provision and Implications for Program Planning. *JAMA*.  
544 American Medical Association; 1979 May 4;241(18):1905–7.
- 545 15. Stein C. Out-of-hospital cardiac arrest cases in Johannesburg, South Africa: A first  
546 glimpse of short-term outcomes from a paramedic clinical learning database.  
547 *Emergency Medicine Journal [Internet]*. 2009 Sep [cited 2023 Jun 27];26(9):670–4.  
548 Available from: [https://www.researchgate.net/publication/26760936\\_Out-of-](https://www.researchgate.net/publication/26760936_Out-of-hospital_cardiac_arrest_cases_in_Johannesburg_South_Africa_A_first_glimpse_of_s hort-term_outcomes_from_a_paramedic_clinical_learning_database)  
549 [hospital\\_cardiac\\_arrest\\_cases\\_in\\_Johannesburg\\_South\\_Africa\\_A\\_first\\_glimpse\\_of\\_s](https://www.researchgate.net/publication/26760936_Out-of-hospital_cardiac_arrest_cases_in_Johannesburg_South_Africa_A_first_glimpse_of_s hort-term_outcomes_from_a_paramedic_clinical_learning_database)  
550 [hort-term\\_outcomes\\_from\\_a\\_paramedic\\_clinical\\_learning\\_database](https://www.researchgate.net/publication/26760936_Out-of-hospital_cardiac_arrest_cases_in_Johannesburg_South_Africa_A_first_glimpse_of_s hort-term_outcomes_from_a_paramedic_clinical_learning_database)
- 551 16. Vaillancourt, C., Stiell, IG., et al. Cardiac arrest care and emergency medical services  
552 in Canada. *Can J Cardiol*. 2004;20(11):1081–90.
- 553 17. Arntz HR, Bossaert L, Carli P, Chamberlain D, Davies M, Dellborg M, et al. The pre-  
554 hospital management of acute heart attacks. Recommendations of a Task Force of  
555 the The European Society of Cardiology and The European Resuscitation Council.  
556 *Eur Heart J. Eur Heart J*; 1998 Aug;19(8):1140–64.
- 557 18. Soar J, Nolan JP, Böttiger BW, Perkins GD, Lott C, Carli P, et al. European  
558 Resuscitation Council Guidelines for Resuscitation 2015: Section 3. Adult advanced  
559 life support. *Resuscitation. Elsevier*; 2015 Oct 1;95:100–47.
- 560 19. Digitalcommons@umaine D, Maine M, Jurson C. Incorporation of Civilian Care in  
561 Emergency Medicine: Retainment of Training and Familiarization of Resources at the  
562 University of Maine.
- 563 20. Larsen MP, Eisenberg MS, Cummins RO, Hallstrom AP. Predicting survival from out-  
564 of-hospital cardiac arrest: a graphic model. *Ann Emerg Med*. 1993 Nov  
565 1;22(11):1652–8.
- 566 21. Tanaka H, Ong MEH, Siddiqui FJ, Ma MHM, Kaneko H, Lee KW, et al. Modifiable  
567 Factors Associated With Survival After Out-of-Hospital Cardiac Arrest in the Pan-  
568 Asian Resuscitation Outcomes Study. *Ann Emerg Med [Internet]*. *Ann Emerg Med*;  
569 2018 May 1 [cited 2022 Dec 22];71(5):608-617.e15. Available from:  
570 <https://pubmed.ncbi.nlm.nih.gov/28985969/>
- 571 22. Wissenberg M, Lippert FK, Folke F, Weeke P, Hansen CM, Christensen EF, et al.  
572 Association of national initiatives to improve cardiac arrest management with rates of  
573 bystander intervention and patient survival after out-of-hospital cardiac arrest. *JAMA*.  
574 American Medical Association; 2013 Oct 2;310(13):1377–84.
- 575 23. Lancet T. Out-of-hospital cardiac arrest: a unique medical emergency. *The Lancet*  
576 [Internet]. 2018 [cited 2023 Feb 3];391:911. Available from: <http://www.global>

577 24. Sasson C, Haukoos JS, Ben-Youssef L, Ramirez L, Bull S, Eigel B, et al. Barriers to  
578 Calling 911 and Learning and Performing Cardiopulmonary Resuscitation for  
579 Residents of Primarily Latino, High-Risk Neighborhoods in Denver, Colorado. *Ann*  
580 *Emerg Med*. Mosby Inc.; 2015 May 1;65(5):545-552.e2.

581 25. Fosbøl EL, Dupre ME, Strauss B, Swanson DR, Myers B, McNally BF, et al.  
582 Association of neighborhood characteristics with incidence of out-of-hospital cardiac  
583 arrest and rates of bystander-initiated CPR: Implications for community-based  
584 education intervention. *Resuscitation*. Elsevier Ireland Ltd; 2014 Nov 1;85(11):1512–  
585 7.

586 26. Swor RA, Jackson RE, Compton S, Domeier R, Zalenski R, Honeycutt L, et al.  
587 Cardiac arrest in private locations: Different strategies are needed to improve  
588 outcome. *Resuscitation* [Internet]. Elsevier Ireland Ltd; 2003 Aug 1 [cited 2023 Jun  
589 19];58(2):171–6. Available from:  
590 <http://www.resuscitationjournal.com/article/S0300957203001187/fulltext>

591 27. Tresch DD, Thakur RK. Cardiopulmonary resuscitation in the elderly. Beneficial or an  
592 exercise in futility? *Emerg Med Clin North Am*. *Emerg Med Clin North Am*;  
593 1998;16(3):649–63.

594 28. Tresch DD, Thakur R, Hoffmann RG, Brooks HL. Comparison of outcome of  
595 resuscitation of out-of-hospital cardiac arrest in persons younger and older than 70  
596 years of age. *Am J Cardiol*. 1988 May 1;61(13):1120–2.

597 29. Alao DO, Mohammed NA, Hukan YO, Al Neyadi M, Jummani Z, Dababneh EH, et al.  
598 The epidemiology and outcomes of adult in-hospital cardiac arrest in a high-income  
599 developing country. [cited 2023 Jun 18]; Available from:  
600 <https://doi.org/10.1016/j.resplu.2022.100220>

601 30. Cope AR, Quinton DN, Dove AF, Sloan JP, Dave SH. Survival from cardiac arrest in  
602 the accident and emergency department. *J R Soc Med*. 1987;80(12):746–9.

603 31. Peberdy MA, Callaway CW, Neumar RW, Geocadin RG, Zimmerman JL, Donnino M,  
604 et al. Part 9: Post-cardiac arrest care: 2010 American Heart Association Guidelines  
605 for Cardiopulmonary Resuscitation and Emergency Cardiovascular Care. Vol. 122,  
606 *Circulation*. 2010.

607 32. Becker LB, Aufderheide TP, Geocadin RG, Callaway CW, Lazar RM, Donnino MW, et  
608 al. Primary outcomes for resuscitation science studies: A consensus statement from  
609 the american heart association. *Circulation*. 2011 Nov 8;124(19):2158–77.

610

611

612

613

614

615

616



617  
618

**Table I: Demographic and Socio-Cultural Characteristics of the OHCA patients**

| <b>Parameters</b>                       | <b>Frequency<br/>(N=387)</b> | <b>Percentage</b> |
|-----------------------------------------|------------------------------|-------------------|
| <b>Patient Age</b>                      |                              |                   |
| <40 years                               | 126                          | 32.6              |
| 40-64 Years                             | 167                          | 43.1              |
| 65+ Years                               | 94                           | 24.3              |
| <b>Patient gender</b>                   |                              |                   |
| Male                                    | 242                          | 62.5              |
| Female                                  | 145                          | 37.5              |
| <b>Marital status</b>                   |                              |                   |
| Married                                 | 271                          | 70.0              |
| Single                                  | 76                           | 19.6              |
| Widowed                                 | 33                           | 8.5               |
| Divorced/Separated                      | 7                            | 1.8               |
| <b>Type of Residence</b>                |                              |                   |
| Urban dwellers                          | 319                          | 82.4              |
| Rural dwellers                          | 68                           | 17.6              |
| <b>Living arrangements</b>              |                              |                   |
| Lives with others                       | 370                          | 95.6              |
| Lives alone                             | 17                           | 4.4               |
| <b>Availability of Family Support</b>   |                              |                   |
| Good: families around them all the time | 225                          | 58.1              |
| Fair: families around them sometimes    | 62                           | 16.0              |
| Poor: don't have families around them   | 14                           | 3.6               |
| Unknown                                 | 86                           | 22.2              |
| <b>Socio-economic class</b>             |                              |                   |
| 26-29: Upper (I)                        | 37                           | 9.6               |
| 16-25: Upper Middle (II)                | 182                          | 47.0              |
| 11-15: Lower Middle (III)               | 97                           | 25.1              |
| 5-10: Upper Lower (IV)                  | 40                           | 10.3              |
| Unknown                                 | 31                           | 8.0               |

619  
620  
621  
622  
623  
624  
625  
626  
627

628 **Table II: Location of arrest, Witness to the arrest, Possession of mobile phones,**  
629 **activation of Emergency Medical System and means of transportation of patients to**  
630 **health facilities**

| <b>Parameters</b>                                                                                 | <b>Frequency (N =387)</b> | <b>Percentage</b> |
|---------------------------------------------------------------------------------------------------|---------------------------|-------------------|
| <b>Location of arrest</b>                                                                         |                           |                   |
| Home                                                                                              | 215                       | 55.6              |
| Public places – Office, Market, Roadside, Party, Place of worship, Sports field, Hotel room       | 147                       | 38.0              |
| En-route to hospital                                                                              | 11                        | 2.8               |
| Peripheral hospital                                                                               | 8                         | 2.1               |
| Delivery home                                                                                     | 4                         | 1.0               |
| Unspecified                                                                                       | 2                         | 0.5               |
| <b>Arrest witnessed or not witnessed</b>                                                          |                           |                   |
| Arrest witnessed                                                                                  | 355                       | 91.7              |
| Arrest not witnessed                                                                              | 32                        | 8.3               |
| <b>Who witnessed?</b>                                                                             |                           |                   |
| Family bystanders                                                                                 | 242                       | 62.5              |
| Public bystanders                                                                                 | 87                        | 22.5              |
| Health personnels                                                                                 | 26                        | 6.7               |
| <b>Possession of mobile phone (N =387)</b>                                                        |                           |                   |
| Yes                                                                                               | 351                       | 90.7              |
| No                                                                                                | 36                        | 9.3               |
| <b>Activation of Emergency Medical System</b>                                                     |                           |                   |
| <b>Was call made for ambulance service?</b>                                                       |                           |                   |
| No                                                                                                | 361                       | 93.3              |
| Yes                                                                                               | 26                        | 6.7               |
| <b>Did any ambulance arrive? (N =26)</b>                                                          |                           |                   |
| No                                                                                                | 17                        | 65.4              |
| Yes                                                                                               | 9                         | 34.6              |
| <b>Facilities inside the ambulances (N =7)</b>                                                    |                           |                   |
| Ambulances without life-support interventions                                                     | 4                         | 57.1              |
| Ambulances with facilities for both BLS and life-saving drugs, without a trained health personnel | 2                         | 28.6              |
| Ambulances with facilities for BLS, life-saving drugs, defibrillators, and trained personnel      | 1                         | 14.3              |
| <b>Estimated Time of ambulance arrival</b>                                                        |                           |                   |
| 10-19 minutes                                                                                     | 5                         | 55.6              |
| 20-29                                                                                             | 0                         | -                 |
| 30-39 minutes                                                                                     | 2                         | 22.2              |
| 40-49 minutes                                                                                     | 0                         | -                 |
| ≥50 minutes                                                                                       | 2                         | 22.2              |
| Mean time (minutes)                                                                               | 25.6 ±20.5                | Median =10        |
| <b>Type of pre-hospital transportation (N =387)</b>                                               |                           |                   |
| Private or public transportation                                                                  | 369                       | 95.3              |
| Ambulances                                                                                        | 7                         | 1.8               |
| Unspecified                                                                                       | 11                        | 2.8               |

631

632

633

**Table III: Pre-hospital medical intervention**

| Parameters                                                       | Frequency | Percentage (%) |
|------------------------------------------------------------------|-----------|----------------|
| <b>Resuscitation (N=387)</b>                                     |           |                |
| Attempted                                                        | 59        | 15.2           |
| Not attempted                                                    | 328       | 84.8           |
| <b>Reasons for resuscitation not attempted (n =328)</b>          |           |                |
| Considered futile                                                | 134       | 34.6           |
| Brought in dead                                                  | 10        | 2.6            |
| Others                                                           | 20        | 5.2            |
| Unknown                                                          | 164       | 42.4           |
| <b>Who instituted resuscitation? (N =59)</b>                     |           |                |
| Family Bystanders                                                | 25        | 42.4           |
| Public Bystanders                                                | 19        | 32.2           |
| Trained health personnel                                         | 15        | 25.4           |
| <b>Number of people available to institute CPR (N =59)</b>       |           |                |
| Multiple rescuer                                                 | 30        | 50.8           |
| Two rescuers                                                     | 16        | 27.1           |
| Single rescuer                                                   | 13        | 22.0           |
| <b>Equipment used during resuscitation (N=59)</b>                |           |                |
| Bag-mask device (AMBU Bag)                                       | 29        | 49.2           |
| Airway devices:                                                  | 12        | 20.3           |
| Oropharyngeal/Nasopharyngeal/Laryngeal mask airway/Tracheal Tube |           |                |
| ECG monitor/AED/Manual defibrillator                             | 2         | 3.4            |
| Barrier device – Pocket mask                                     | 2         | 3.4            |
| Unspecified                                                      | 14        | 23.7           |
| <b>First monitored rhythm</b>                                    |           |                |
| Pulse less VT                                                    | 2         | 3.4            |
| Asystole                                                         | 1         | 1.7            |
| Bradycardia                                                      | 1         | 1.7            |
| Unknown                                                          | 55        | 93.2           |

634

635

636

637

638

639

640

641

642

643 **Table IV: Age and gender distribution of OHCA patients, location of arrest, witnesses**  
644 **to arrest and who instituted resuscitation VS outcome**

| Parameters | Frequency/Percenta | Pre-hospital | Survival to | Survival to |
|------------|--------------------|--------------|-------------|-------------|
|------------|--------------------|--------------|-------------|-------------|

|                                                         | ge (N =387)               | ROSC n =14<br>(3.6%) | hospital admission<br>n =7 (1.8%) | hospital discharge<br>n =7 (1.8%) |
|---------------------------------------------------------|---------------------------|----------------------|-----------------------------------|-----------------------------------|
| <b>Age in Years</b>                                     |                           |                      |                                   |                                   |
| < 65 years (N =50 or<br><b>84.7%</b> )                  | 293(75.7)                 | 11 (22.0)            | 5 (10.0)                          | 5 (10.0)                          |
| ≥ 65 Years (N=9 or<br><b>15.3%</b> )                    | 94 (24.3)                 | 3 (33.3)             | 2 (22.2)                          | 2 (22.2)                          |
| <b>p Value</b>                                          | Not Significant           | 0.462                | 0.296                             | 0.296                             |
| <b>Gender</b>                                           |                           |                      |                                   |                                   |
| Male                                                    | 242 (62.5)                | 4 (1.7)              | 1 (0.4)                           | 1 (0.4)                           |
| Female                                                  | 145 (37.5)                | 10 (6.9)             | 6 (4.1)                           | 6 (4.1)                           |
| <b>p Value</b>                                          | Statistically Significant | 0.007                | 0.023 <sup>y</sup>                | 0.023 <sup>y</sup>                |
| <b>Location of arrest</b>                               |                           |                      |                                   |                                   |
| Home N=215<br>(55.6%)                                   | 24 (11.2)                 | 3 (12.5)             | 1 (4.2)                           | 1 (4.2)                           |
| Public places<br>N=147(38.0%)                           | 23 (15.6)                 | 4 (17.4)             | 0                                 | 0                                 |
| Other places N=25<br>(6.5%)                             | 12 (48.0)                 | 7 (58.3)             | 6 (50.0)                          | 6 (50.0)                          |
| <b>p Value</b>                                          | Statistically Significant | 0.006                | 0.001 <sup>y</sup>                | 0.001 <sup>y</sup>                |
| <b>Witnesses to arrest<br/>(N =355)</b>                 |                           |                      |                                   |                                   |
| Family members (N<br>=242)                              | 242 (68.2)                | 4 (1.7)              | 1 (0.4)                           | 1 (0.4)                           |
| Public bystanders (N<br>=87)                            | 87 (24.5)                 | 3 (3.4)              | 0 (0.0)                           | 0 (0.0)                           |
| Trained health<br>personnel (N =26)                     | 26 (7.3)                  | 7 (26.9)             | 6 (23.0)                          | 6 (23.0)                          |
| <b>p Value</b>                                          | Statistically Significant | 0.001                | 0.001 <sup>y</sup>                | 0.001 <sup>y</sup>                |
| <b>Who instituted<br/>resuscitation (N =59)</b>         |                           |                      |                                   |                                   |
| Bystanders (N =25<br>Family members + 19<br>Public =44) | 44 (74.6)                 | 7(15.9)              | 1 (2.3)                           | 1 (2.3)                           |
| Trained health<br>personnel (N =15)                     | 15 (25.4)                 | 7 (46.7)             | 6 (40.0)                          | 6 (40.0)                          |
| <b>p Value</b>                                          | Statistically Significant | 0.020                | 0.001                             | 0.001                             |

645 \*<sup>y</sup> =Yates correction

646

647

648

649 **Table V: Outcome of resuscitation**

| Outcome measures                                         | Frequency | Percentage |
|----------------------------------------------------------|-----------|------------|
| Pre-hospital return of spontaneous circulation (ROSC) (N |           |            |

|                                                          |    |      |
|----------------------------------------------------------|----|------|
| =59)                                                     | 14 | 23.7 |
| Yes                                                      |    |      |
| No                                                       | 45 | 76.3 |
| <b>Survival to hospital admission (N =14)</b>            |    |      |
| Survived                                                 | 7  | 50.0 |
| Suffered re-arrest and died during transport to hospital | 7  | 50.0 |
| <b>Place of Post Arrest Care in the hospital (N =7)</b>  |    |      |
| ICU                                                      | 4  | 57.1 |
| HDU                                                      | 1  | 14.3 |
| Open ward                                                | 2  | 28.6 |
| <b>Overall Hospital discharge survival (N= 387)</b>      |    |      |
| Survived to discharge                                    | 7  | 1.8  |
| <b>Neurological status at discharge (N =7)</b>           |    |      |
| CPC 1 or 2                                               | 4  | 57.1 |
| CPC 3                                                    | 3  | 42.9 |

650 \*CPC =Cerebral Performance Category

651

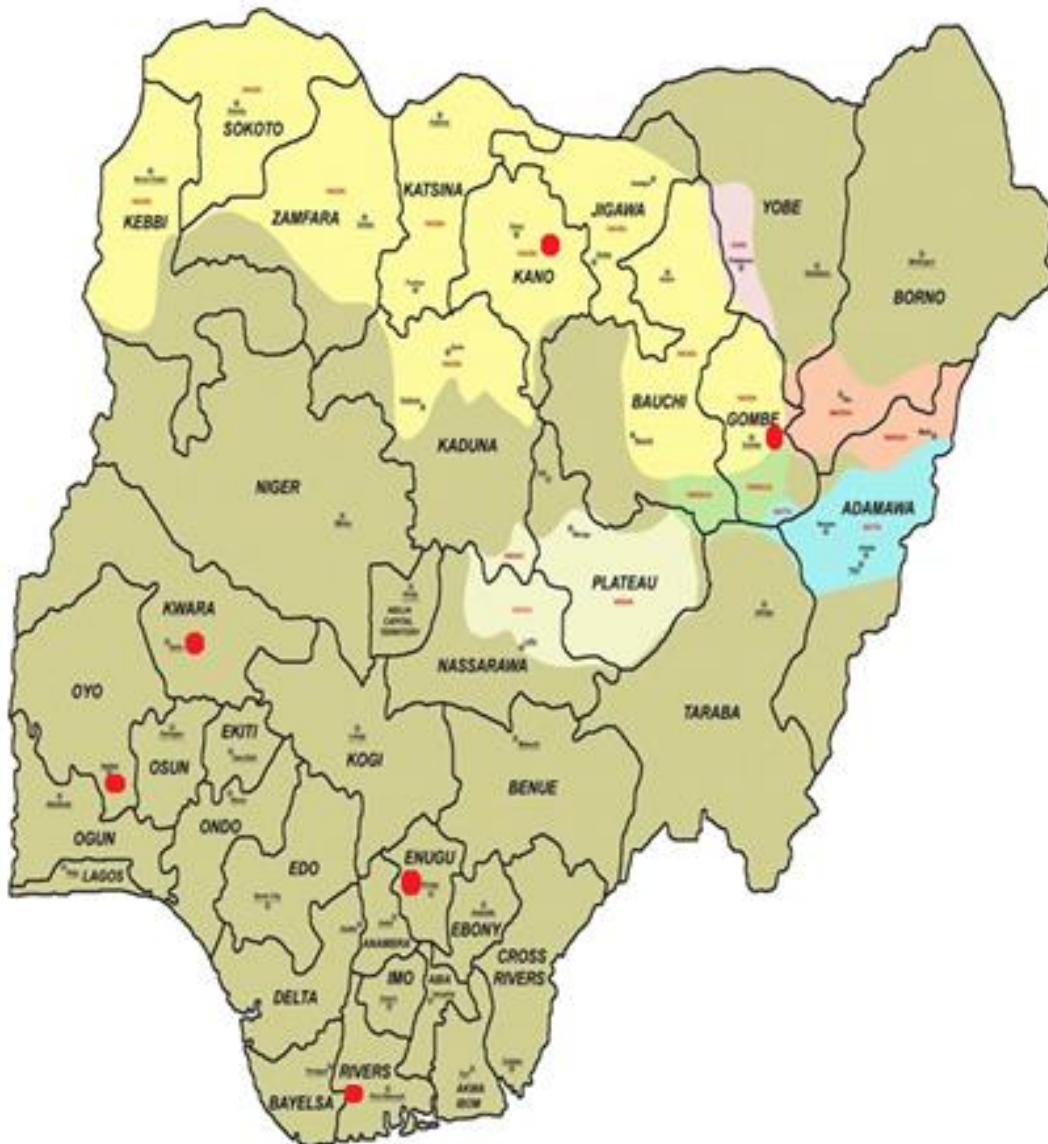

652

Figure 1: Map of Nigeria showing the distribution of participating hospitals in the six geopolitical zones.

● Sites of study.
